# Supplementary material for: Iron Acquisition and Siderophore Release by Carbapenem-Resistant Sequence Type 258 Klebsiella pneumoniae
Source: PubMed Central journal article supplement (PMC5907654; doi:10.1128/msphere.00125-18), 2018-04-18
Supplement: sph002182514sf1.pdf [file sph002182514sf1.pdf]

**A)**

ST258B ATGAACCGACAATCCTGGCTGCTCAATCTCAGCCTGCTGAAAACCTACCCGGCGTTTCGC  
ST258A ATGAACCGACAATCCTGGCTGCTCAATCTCAGCCTGCTGAAAACCTACCCGGCGTTTCGC  
\*\*\*\*\*

ST258B GCCGTTTTTATCGCTCGCTTTATCTCTATTCTGTGCTTGGCCTGCTGGGCGTGGCCATT  
ST258A GCCGTTTTTATCGCTCGCTTTATCTCTATTCTGTGCTTGGCCTGCTGGGCGTGGCCATT  
\*\*\*\*\*

ST258B CCGGTGCAGATCCAGATGATGACCCATTGACCTGGCAGGTGGGCTGTCGGTGACGCTG  
ST258A CCGGTGCAGATCCAGATGATGACCCATTGACCTGGCAGGTGGGCTGTCGGTGACGCTG  
\*\*\*\*\*

ST258B ACCGGGGCGTCGATGTTTGTGGTCTGATGGTGGGGGGCGTGGCTGACCGCTATGAA  
ST258A ACCGGGGCGTCGATGTTTGTGGTCTGATGGTGGGGGGCGTGGCTGACCGCTATGAA  
\*\*\*\*\*

ST258B CGTAAACGCCTGATCCTGCTGGCGCGGGCACCTGCGGCGTGGGCTTGTGCGCCTGTGT  
ST258A CGTAAACGCCTGATCCTGCTGGCGCGGGCACCTGCGGCGTGGGCTTGTGCGCCTGTGT  
\*\*\*\*\*

ST258B CTGAACGCCCTGCT**TGCCGGAGCC**-----  
ST258A CTGAACGCCCTGCT**TGCCGGAGCC**GTGCTGGCGGCGATCTACCTGCTGGGGATCTGGGAC  
\*\*\*\*\*

ST258B -----  
ST258A GGGTTCTTCGCCCTCGTTGGGGGTGACCGCGCTGCTGGCGGCGACCCCGGCGCTGGTGGGA

ST258B -----  
ST258A CCGGAAAACCTGATGCAGGCCGGGGCCATCACTATGTTGACGGTGCGCCTGGGCTCGGTG

ST258B -----  
ST258A ATTTCCGGATGATCGGGCGCCTGCTGCTGGCCACCGGCGGCTGGCCTGGAACCTTTGGC

ST258B -----  
ST258A CTGGCGGCGGGGACCTTTATCACCACCTTAACCCTGCTGCGTCTGCCGAGCTGCCG

ST258B -----  
ST258A CCGCCTCCGACCGCGGAGCATCCGCTGCGCTCCCTGCTGGCGGGGCTGACCTTCCTC

ST258B -----CGTTATCGGCGGGATTGCGCTGCTTGGCGGTCTGCTGACCATGGCCAGC  
ST258A **TGCCGGAGCC**CGCTTATCGGCGGGATTGCGCTGCTTGGCGGTCTGCTGACCATGGCCAGC  
\*\*\*\*\*

ST258B GCGGTGCGGGTGTCTATCCGGCGCTGGCCGG**TAG**CTGGCAGATGTCGGCCGGACAGATT  
ST258A GCGGTGCGGGTGTCTATCCGGCGCTGGCCGG**TAG**CTGGCAGATGTCGGCCGGACAGATT  
\*\*\*\*\*

ST258B GGCTGCTGTACGCCGCTATTCCGCTCGGTGCGGCGCTGGGGCGTTGACCAGCGGCCAG  
ST258A GGCTGCTGTACGCCGCTATTCCGCTCGGTGCGGCGCTGGGGCGTTGACCAGCGGCCAG  
\*\*\*\*\*

ST258B CTGGCCCAGACGGTGCAGCCGGGCGCGCTGATGCTGGCAGCAGCGTGGGATCGTTTGTG  
ST258A CTGGCCCAGACGGTGCAGCCGGGCGCGCTGATGCTGGCAGCAGCGTGGGATCGTTTGTG  
\*\*\*\*\*

ST258B GCCATTGCGCTGTTTACGCTGATGCCGCACTGGGCATTGGGCGGCTGTGCCTGGCGCTG  
ST258A GCCATTGCGCTGTTTACGCTGATGCCGCACTGGGCATTGGGCGGCTGTGCCTGGCGCTG  
\*\*\*\*\*

ST258B TTTGGCTGGCTGAGCGCTATTAGCTCGCTGCTGCAGTACACCCTGATTCAGACCCAGACG  
ST258A TTTGGCTGGCTGAGCGCTATTAGCTCGCTGCTGCAGTACACCCTGATTCAGACCCAGACG  
\*\*\*\*\*

ST258B CCGGAACATATGCTCGGGCGGATTAACGGTCTGTGGACCGCGCAAACGTCACCGGCGAC  
ST258A CCGGAACATATGCTCGGGCGGATTAACGGTCTGTGGACCGCGCAAACGTCACCGGCGAC  
\*\*\*\*\*

ST258B GCCATCGGCGCGGCGCTGCTCGGCGGCTTAGGGGCGGTAATGACGCCGGCGGCATCCGCC  
ST258A GCCATCGGCGCGGCGCTGCTCGGCGGCTTAGGGGCGGTAATGACGCCGGCGGCATCCGCC  
\*\*\*\*\*

ST258B AGCGCCAGCGGCTGGGCGCTGGCGCTTGTTCGGTGTGCTGCTGGTTGGGCTGCTACGCGAG  
ST258A AGCGCCAGCGGCTGGGCGCTGGCGCTTGTTCGGTGTGCTGCTGGTTGGGCTGCTACGCGAG  
\*\*\*\*\*

ST258B CTGCGCCGTTTCCAGCGCCCGAAATTGTCAACGAAAGTTAA  
ST258A CTGCGCCGTTTCCAGCGCCCGAAATTGTCAACGAAAGTTAA  
\*\*\*\*\*

**B)**

ST258a 1 MNRQSWLLNLSLLKTHPAFRAVFIARFISILSLGLLGVAIPVQIQMMTHSTWQVGLSVTL  
ST258b 1 MNRQSWLLNLSLLKTHPAFRAVFIARFISILSLGLLGVAIPVQIQMMTHSTWQVGLSVTL  
\*\*\*\*\*

ST258a 61 TGASMFVGLMVGVLADRYERKRLILLARGTCGVGFVGLCLNALLPEPSLAAIYLLGIWD  
ST258b 61 TGASMFVGLMVGVLADRYERKRLILLARGTCGVGFVGLCLNALLPEPAYRRDCAAWRSA  
\*\*\*\*\*

ST258b 121 GFFASLGVTALLAATPALVGRENLMQAGAITMLTVRLGSVISPMIGLLLATGGVAWNFG  
ST258b 121 DHGQRGAGALSGAGR-----

ST258a 181 LAAAGTFITTLTLLRLPQLPPPPQPREHPLRSLLAGLTFLCRSPLIGGIALLGGLLTMAS  
ST258b 181 -----

ST258a 241 AVRVLYPALAGSWQMSAGQIGLLYAAIPLGAALGALTSGQLAQTVRPGALMLATTVGSFV  
ST258b 241 -----

ST258a 301 AIALFSLMPHWALGALCLALFGWLSAISLLQYTTLIQQTPEHMLGRINGLWTAQNVTGD  
ST258b 301 -----

ST258a 361 AIGAALLGGLGAVMTPAASASASGWALALVGVLVGLLRELRRFQRPEIVNES  
ST258b 361 -----

**Figure S1**
