# Supplementary material for: Iron Acquisition and Siderophore Release by Carbapenem-Resistant Sequence Type 258 Klebsiella pneumoniae
Source: PubMed Central journal article supplement (PMC5907654; doi:10.1128/msphere.00125-18), 2018-04-18
Supplement: sph002182514sf2.pdf [file sph002182514sf2.pdf]

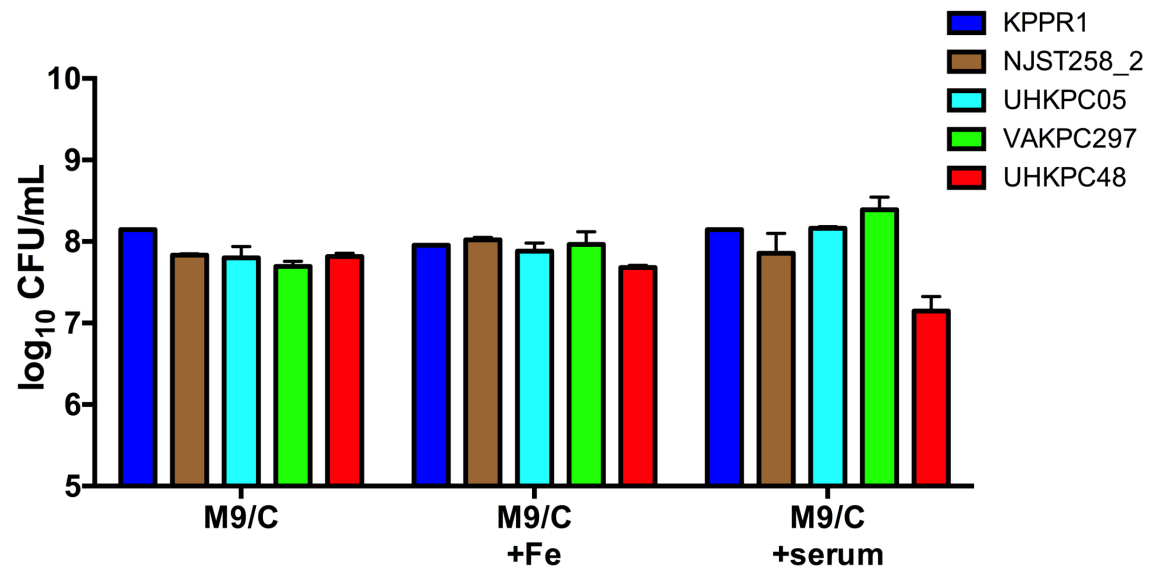

Figure S2
