# Supplementary material for: Iron Acquisition and Siderophore Release by Carbapenem-Resistant Sequence Type 258 Klebsiella pneumoniae
Source: PubMed Central journal article supplement (PMC5907654; doi:10.1128/msphere.00125-18), 2018-04-18
Supplement: sph002182514st1.pdf [file sph002182514st1.pdf]

**Table S1**

| BioSample_s  | Experiment_s | Sample_Name_s         | Run_s      | SRA_Sample_s | MBases_l | WGS RefSeq Accession | WGS Biosample |
|--------------|--------------|-----------------------|------------|--------------|----------|----------------------|---------------|
| SAMN04330238 | SRX1485614   | UHKPC05M9_Rep_1       | SRR3018848 | SRS1208831   | 646      | GCF_000709245        | SAMN02141987  |
| SAMN04330239 | SRX1485615   | UHKPC05M9_Rep_2       | SRR3018849 | SRS1208834   | 682      |                      |               |
| SAMN04330240 | SRX1485616   | UHKPC05M9FE_Rep_1     | SRR3018850 | SRS1208833   | 563      |                      |               |
| SAMN04330241 | SRX1485617   | UHKPC05M9FE_Rep_2     | SRR3018851 | SRS1208832   | 619      |                      |               |
| SAMN04330242 | SRX1485620   | UHKPC05M9SERUM_Rep_1  | SRR3018857 | SRS1208837   | 589      |                      |               |
| SAMN04330243 | SRX1485621   | UHKPC05M9SERUM_Rep_2  | SRR3018858 | SRS1208836   | 623      |                      |               |
| SAMN04330244 | SRX1485622   | UHKPC48M9_Rep_1       | SRR3018859 | SRS1208838   | 817      | GCF_000409085        | SAMN02142018  |
| SAMN04330245 | SRX1485623   | UHKPC48M9_Rep_2       | SRR3018861 | SRS1208840   | 843      |                      |               |
| SAMN04330246 | SRX1485628   | UHKPC48M9FE_Rep_1     | SRR3018863 | SRS1208843   | 767      |                      |               |
| SAMN04330247 | SRX1485637   | UHKPC48M9FE_Rep_2     | SRR3018907 | SRS1208852   | 736      |                      |               |
| SAMN04330248 | SRX1485691   | UHKPC48M9SERUM_Rep_1  | SRR3019181 | SRS1208860   | 622      |                      |               |
| SAMN04330249 | SRX1485692   | UHKPC48M9SERUM_Rep_2  | SRR3019182 | SRS1208859   | 593      |                      |               |
| SAMN04330250 | SRX1485693   | VAKPC297M9_Rep_1      | SRR3019183 | SRS1208858   | 669      | GCF_000406545        | SAMN02142050  |
| SAMN04330251 | SRX1485694   | VAKPC297M9_Rep_2      | SRR3019185 | SRS1208861   | 607      |                      |               |
| SAMN04330252 | SRX1485711   | VAKPC297M9FE_Rep_1    | SRR3019202 | SRS1208862   | 619      |                      |               |
| SAMN04330253 | SRX1485712   | VAKPC297M9SERUM_Rep_1 | SRR3019203 | SRS1208879   | 820      |                      |               |
| SAMN04330254 | SRX1485713   | VAKPC297M9SERUM_Rep_2 | SRR3019204 | SRS1208880   | 687      |                      |               |
| SAMN04330232 | SRX1485608   | NJST2582M9_Rep_1      | SRR3018841 | SRS1208826   | 698      | GCF_000597905        | SAMN03081501  |
| SAMN04330233 | SRX1485609   | NJST2582M9_Rep_2      | SRR3018842 | SRS1208825   | 639      |                      |               |
| SAMN04330234 | SRX1485610   | NJST258M9FE_Rep_1     | SRR3018843 | SRS1208827   | 733      |                      |               |
| SAMN04330235 | SRX1485611   | NJST258M9FE_Rep_2     | SRR3018844 | SRS1208829   | 633      |                      |               |
| SAMN04330236 | SRX1485612   | NJST258M9SERUM_Rep_1  | SRR3018845 | SRS1208828   | 751      |                      |               |
| SAMN04330237 | SRX1485613   | NJST258M9SERUM_Rep_2  | SRR3018846 | SRS1208830   | 642      |                      |               |
| SAMN04330226 | SRX1485596   | KP4M9_Rep_1           | SRR3018830 | SRS1208818   | 555      | GCF_000742755        | SAMN02982872  |
| SAMN04330227 | SRX1485598   | KP4M9_Rep_2           | SRR3018831 | SRS1208816   | 755      |                      |               |
| SAMN04330228 | SRX1485599   | KP4M9FE_Rep_1         | SRR3018832 | SRS1208815   | 673      |                      |               |
| SAMN04330229 | SRX1485602   | KP4M9FE_Rep_2         | SRR3018836 | SRS1208820   | 535      |                      |               |
| SAMN04330230 | SRX1485603   | KP4M9SERUM_Rep_1      | SRR3018837 | SRS1208823   | 694      |                      |               |
| SAMN04330231 | SRX1485604   | KP4M9SERUM_Rep_2      | SRR3018838 | SRS1208822   | 672      |                      |               |
